# Supplementary material
Source: Springer Nature journal article supplement (https://www.springermedizin.de/resource/supplementary/12933_2013_675_MOESM4_ESM.pdf/9539112)

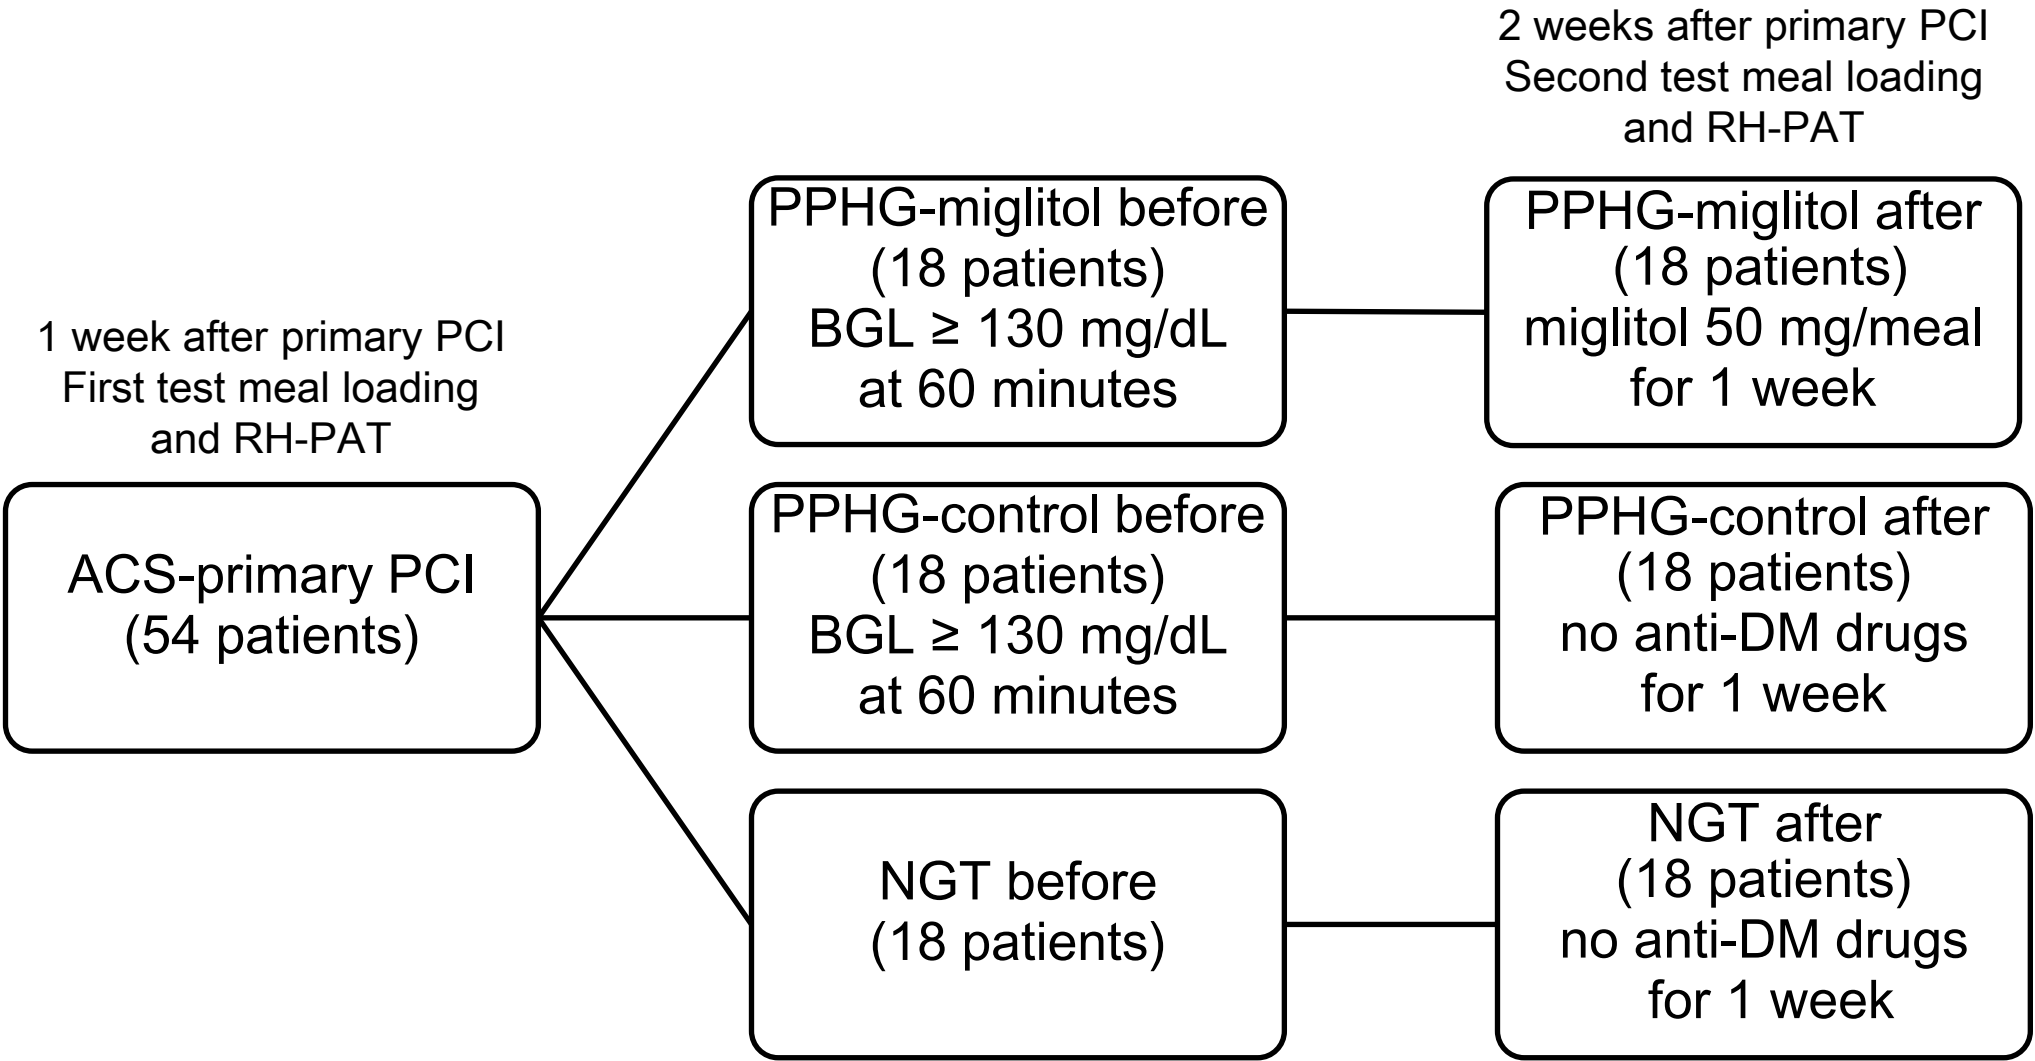

Supplement: MOESM4 [file 9539112]
